# Supplementary material
Source: PubMed Central journal article supplement (PMC5995579)
Supplement: NIHMS967119-supplement.pdf [file NIHMS967119-supplement.pdf]

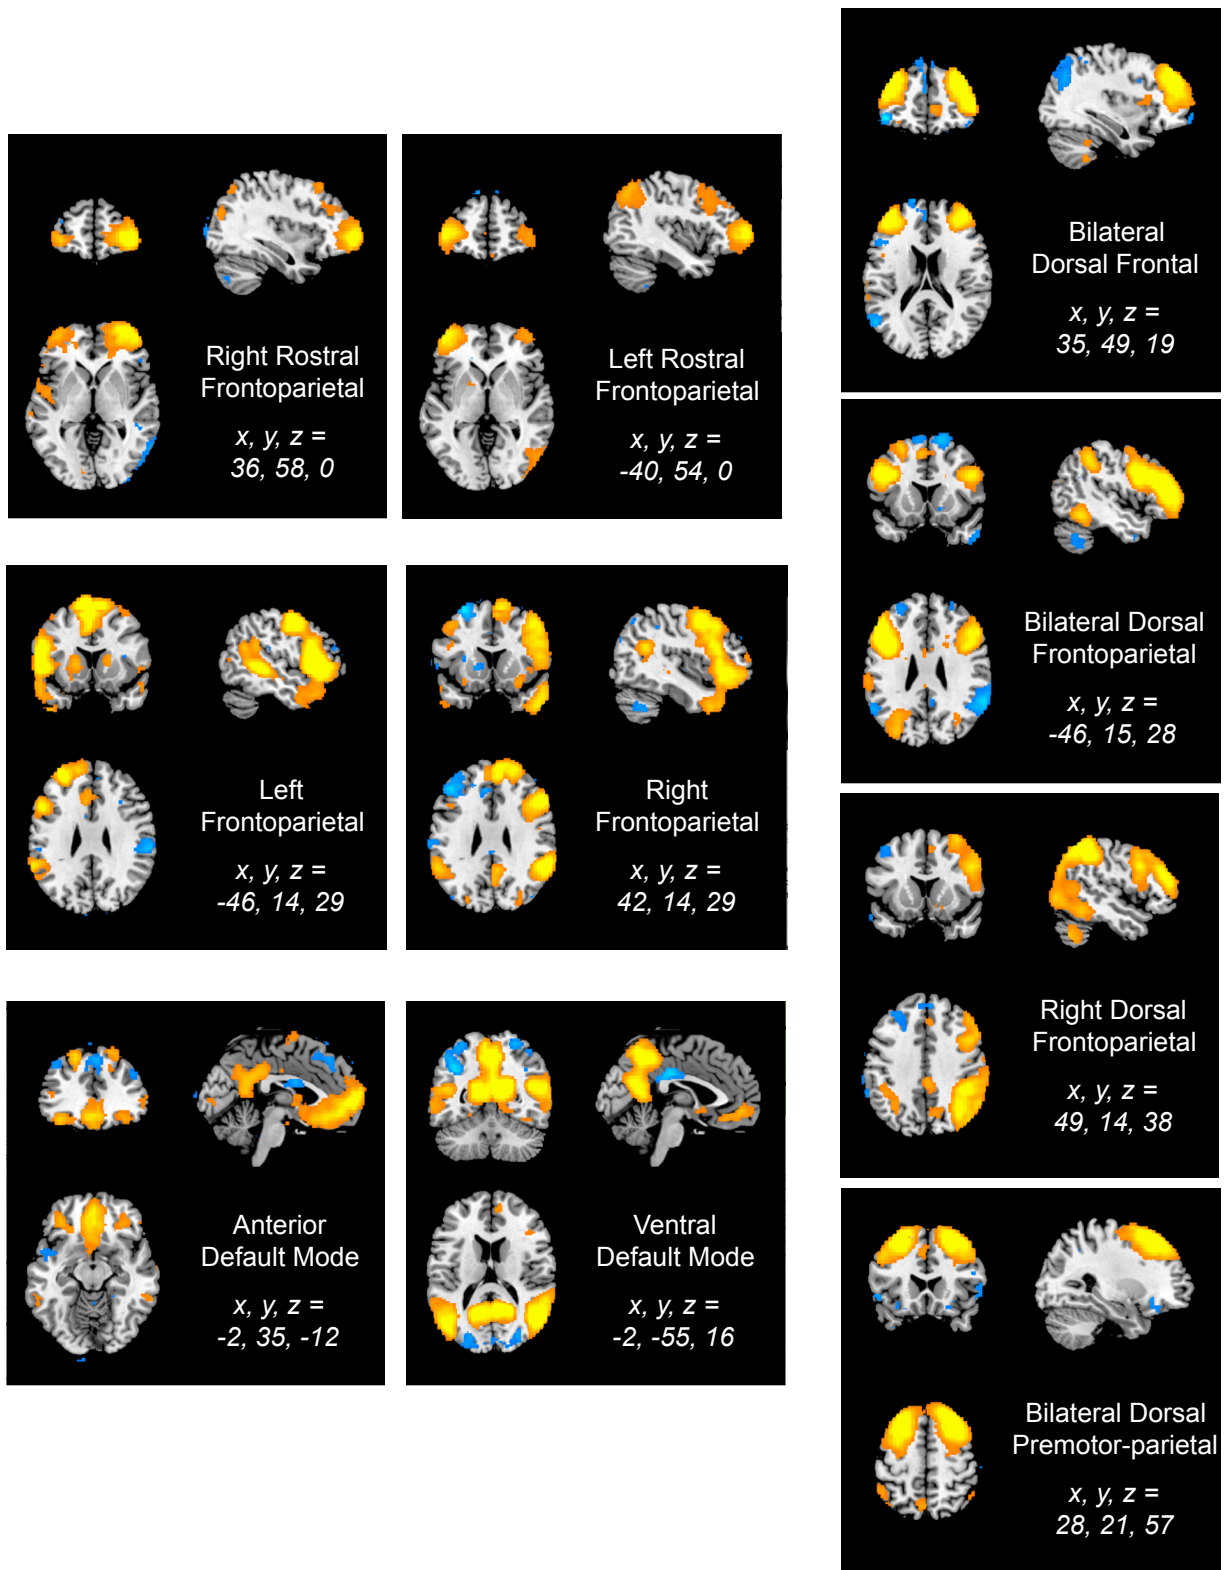

**Supplementary Figure 1.** Frontal resting-state networks targeted for analysis in the current study are displayed, and MNI positions are given for each plane shown.
